# Supplementary material
Source: PubMed Central journal article supplement (PMC6246895)
Supplement: zii999092606s1.pdf [file zii999092606s1.pdf]

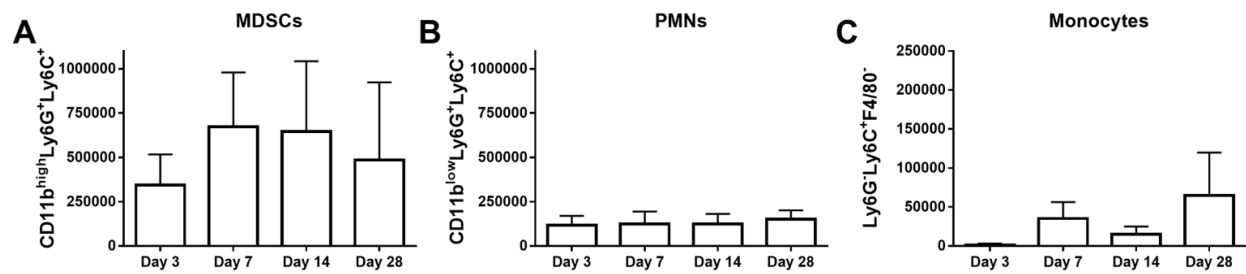

**Figure S1. Absolute numbers of infiltrating leukocytes in *S. aureus* biofilm-associated tissues.** Orthopedic implant-associated tissue was collected at days 3, 7, 14, and 28 post-infection and the number of live cells in each sample was counted prior to flow cytometry analysis to determine the absolute numbers of MDSC (A), PMN (B) and monocyte (C) infiltrates in infected tissues. Results represent the mean  $\pm$  SD from 5 mice/time point.

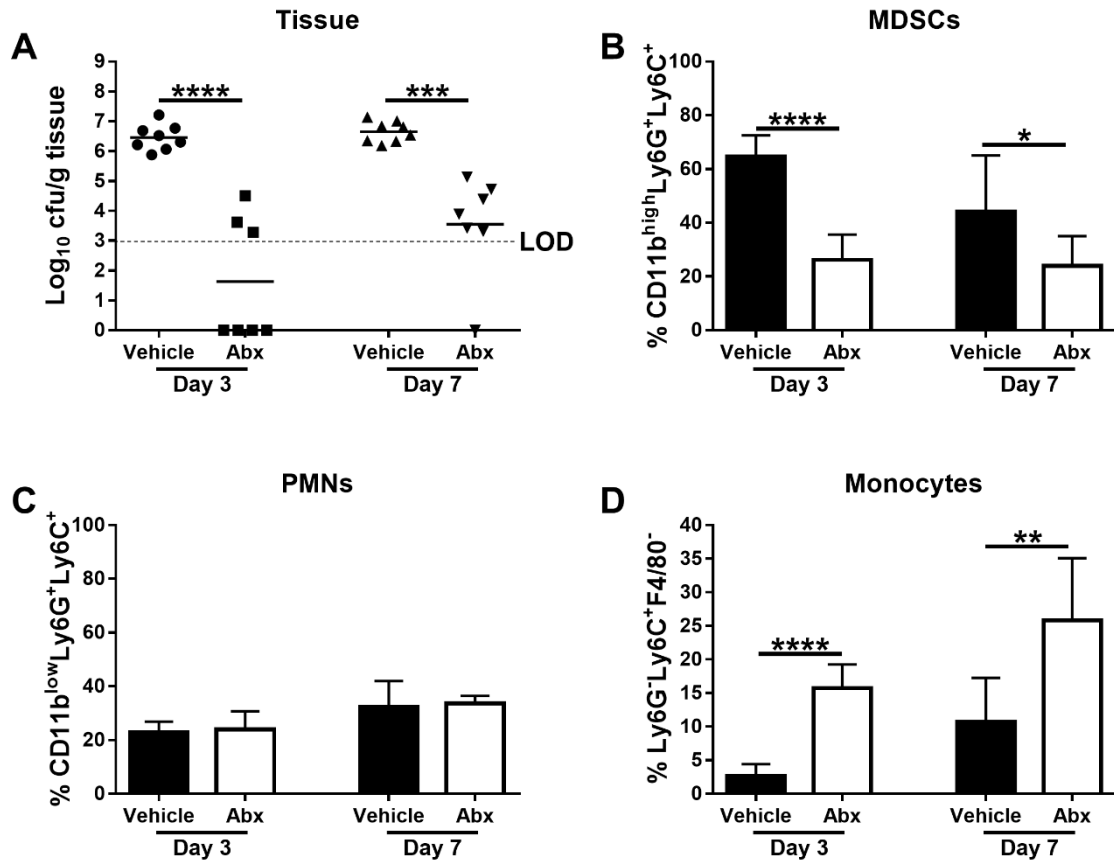

**Figure S2. Kinetics of *S. aureus* biofilm establishment during orthopedic implant infection.**

Mice (n=7-8/group) received daily i.p. injections of vehicle (PBS) or antibiotics (5 mg/kg daptomycin and 25 mg/kg rifampicin) beginning at day 3 or day 7 following *S. aureus* infection. Mice were sacrificed seven days after antibiotic treatment (days 10 and 14, respectively), whereupon implant-associated tissue was collected for quantitation of bacterial burdens (A), MDSCs (B), PMNs (C), and monocytes (D). Significant differences are denoted by asterisks (\*,  $p < .05$ ; \*\*,  $p < 0.01$ ; \*\*\*,  $p < 0.001$ ; \*\*\*\*,  $p < 0.001$ ; Student *t*-test).
